# Supplementary material
Source: HighWire-hosted journal article supplement (https://heartasia.bmj.com/content/8/1/83)
Supplement: inline-supplementary-material-1 [file inline-supplementary-material-1.pdf]

**Supplementary Table S1: Physical and functional details of studied SNPs of AGT, ACE, AGTR1 and ADD1**

| Gene         | SNP                     | Region   | Synonymous/ Non-synonymous       | Base pair change (Ancestral allele> altered allele) | Amino acid change              | Importance/Involvement in other disease                                                                                                                                                                                                                  |
|--------------|-------------------------|----------|----------------------------------|-----------------------------------------------------|--------------------------------|----------------------------------------------------------------------------------------------------------------------------------------------------------------------------------------------------------------------------------------------------------|
| <b>AGT</b>   | -532C/T (rs5046)        | 5' UTR   | Synonymous                       | C>T                                                 | -                              | Part of core-promoter element 1 or lie in the upstream of promoter and play critical role in transcriptional regulation. <sup>1-4</sup>                                                                                                                  |
|              | -217G/A (rsID:5049)     | 5' UTR   | Synonymous                       | G>A                                                 | -                              |                                                                                                                                                                                                                                                          |
|              | -152G/A (rsID:11568020) | Promoter | Synonymous                       | G>A                                                 | -                              |                                                                                                                                                                                                                                                          |
|              | -20A/C (rsID:5050)      | Promoter | Synonymous                       | A>C                                                 | -                              |                                                                                                                                                                                                                                                          |
|              | -6G/A (rsID:5051)       | Promoter | Synonymous                       | G>A                                                 | -                              |                                                                                                                                                                                                                                                          |
|              | 174T/M (rsID:4762)      | Exon     | Non-synonymous Missense mutation | C>T                                                 | T [Threonine]⇒ M [Methionine]  | Increase the risk of high BP and also known to increase the plasma AGT concentration. <sup>3, 5, 6</sup>                                                                                                                                                 |
|              | 235M/T (rsID:699)       | Exon     | Non-synonymous Missense mutation | T>C                                                 | M [Methionine] ⇒ T [Threonine] |                                                                                                                                                                                                                                                          |
| <b>ACE</b>   | I/D (rsID:4646944)      | Intron   | -                                | Insertion (I)> Deletion (D) of a 287bp marker       | -                              | The D allele is associated with elevated ACE levels in various cardiovascular diseases and serves as risk allele for EH. <sup>7-9</sup>                                                                                                                  |
| <b>AGTR1</b> | 1166A/C (rsID:5186)     | 3' UTR   | Synonymous                       | A>C                                                 | -                              | The C allele of 1166A/C polymorphism interferes with the base-pairing complementariness between AGTR1 mRNA and microRNA-155 and thereby increases AGTR1 protein expression that associates with increased risk of cardiovascular diseases. <sup>10</sup> |
| <b>ADD1</b>  | 614G/T (rsID:4961)      | Exon     | Non-synonymous                   | G>T                                                 | G [Glycine]⇒ T [Tryptophan]    | This SNP leads to stimulation of sodium-potassium adenosine triphosphatase activity in renal tubular cells, which increases renal sodium reabsorption and is involved in BP control. <sup>11</sup>                                                       |

A: Adenine; G:guanine; T: thymine; C:Cytosine

**Supplementary Table S2: Primers and PCR conditions of the polymorphisms of genotyped using Restriction Fragment Length Polymorphism**

| Gene         | SNP and rsID           | Primer sequence                                                                            | PCR Cycling conditions                                                 | Restriction enzyme | Digestion condition | Product size (bp)                                          |
|--------------|------------------------|--------------------------------------------------------------------------------------------|------------------------------------------------------------------------|--------------------|---------------------|------------------------------------------------------------|
|              | -6G/A<br>(rsID:5051)   | F 5' TGC ACC GGC TCA CTC TGT TCA -3'<br>R 5' ATC TCC CGG GCC TTT TCC TCC TA -3'            | I 94°C 4', D 94°C 30", A 66°C 30", E 72°C 40", 38cy, FE 72°C 10'       | <i>BstNI</i>       | 60°C<br>3 hours     | GG=183, 107, 55<br>GA=183, 129, 107, 55<br>AA=129, 107, 55 |
| <i>AGT</i>   | 174T/M<br>(rsID:4762)  | F 5'- TGG CAC CCT GGC CTC TCT CTA TCT -3'<br>R 5'- CAG CCT GCA TGA ACC TGT CAA TCT -3'     | I 95°C 4', D 95°C 15", A 67°C 45", E 72°C 45", 38cy, FE 72°C 10'       | <i>NcoI</i>        | 37°C overnight      | TT=303<br>TM=303, 211, 92<br>MM=211, 92                    |
|              | 235M/T<br>(rsID:699)   | F: 5'-CCG TTT GTG CAG GGC CTG GCT CTC T- 3'<br>R: 5'-CAG GGT GCT GTC CAC ACT GGA CCC C -3' | I 95°C 4', D 95°C 15", A 65°C 45", E 72°C 45" 38 cy, FE 72°C 10'       | <i>Tth III</i>     | 65°C<br>2 hours     | TT=141<br>TM=165,141<br>MM=165                             |
| <i>ACE</i>   | I/D<br>(rsID:4646944)  | F: 5' CTG GAG ACC ACT CCC ATC CTT TCT 3'<br>R: 5' GAT GTC GCC ATC ACA TTC GTCAGA T 3'      | I 94°C 4'; D 94°C 1';<br>A 58°C 45", E 72°C 45";<br>30 cy, FE 72°C 7'  | -                  | -                   | DD= 190<br>ID=190, 490<br>II =490                          |
| <i>AGTRI</i> | 1166A/C<br>(rsID:5186) | F: 5' GCA GCA CTT CAC TAC CAA ATG GGC 3'<br>R: 5' CAG GAC AAA AGC AGG CTA GGG AGA 3'       | I 94°C 3'; D 94°C 30";<br>A 58°C 45", E 72°C 45";<br>30 cy, FE 72°C 7' | <i>Hae III</i>     | 37°C overnight      | AA= 255<br>AC =231, 255<br>CC =231                         |
| <i>ADDI</i>  | 614G/T<br>(rsID:4961)  | F: 5' CTC CTT TGC TAG TGA CGG TGA TTC G3'<br>R: 5' TTG GGA CTG CTT CCA TTC GGC C C3'       | I 94°C 3'; D 94°C 30";<br>A 61°C 45", E 72°C 45";<br>30 cy, FE 72°C 7' | <i>Sau 96I</i>     | 65°C<br>2 hours     | TT= AA= 147<br>GT =147, 122, 25<br>GG =122, 25             |

F, forward; R, reverse; I, initial denaturation; A, annealing; D, denaturation; E, extension; FE, final extension;cy, cycles.

**Supplementary Table S3: Primers and PCR conditions of the polymorphisms of AGT genotyped using SNaPshot**

| Gene | SNP and rsID                   | Primer sequence                                                                                                   | PCR Cycling conditions                                                 | SNaPshot cycling condition                    | Genotyping                                                                            | Product size (bp) |
|------|--------------------------------|-------------------------------------------------------------------------------------------------------------------|------------------------------------------------------------------------|-----------------------------------------------|---------------------------------------------------------------------------------------|-------------------|
| AGT  | -532C/T<br>(rsID:5046)         | F 5' GTC CCT TCA GTG CCC TAA TAC CAT G 3'<br>R 5' GAC CCT GCT GCC CGC TCA T 3'<br>IP 5' GCC CTA TTT ATA GCT GAG3' | I 95°C 4", D 95°C 30",<br>A 64°C 40", E 72°C 40"<br>32 cy, FE 72°C 10" |                                               | 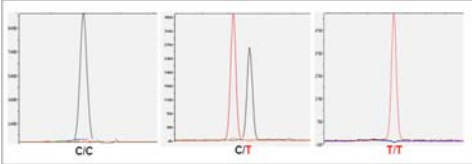   | 484               |
|      | -217G/A<br>(rsID:5049)         | F 5' TCA GAA GGC CTG GGTGGTTGG 3'<br>R 5' CCTCTCCCGGCCTTTTCCTC 3'<br>IP 5' TGTAAGCTGACCCTGCACC 3'                 |                                                                        | D 96°C 10", A<br>58°C 5", E 60°C<br>30", 35cy |    | 260               |
|      | -152G/A<br>(rsID:1156<br>8020) | F 5' TCAGAAGGCCTGGGTGGTTGG 3'<br>R 5' CCTCTCCCGGCCTTTTCCTC 3'<br>IP 5' TCCTGGAAGAGGTCCCAGC 3'                     | I 95°C 4", D 95°C 30",<br>A 64°C 40", E 72°C 40"<br>32 cy, FE 72°C 10" |                                               |    | 260               |
|      | -20A/C<br>(rsID:5050)          | F 5' TCAGAAGGCCTGGGTGGTTGG 3'<br>R 5' CCTCTCCCGGCCTTTTCCTC 3'<br>IP 5' GCCCTATTTATAGCTGAG 3'                      |                                                                        |                                               |  | 257               |

F, forward; R, reverse; IP, internal primer; A, annealing; D, denaturation; E, extension; cy, cycles.

**Supplementary table S4: Goodness-of-fit test for observed and expected genotypes distribution of AGT ACE, AGTR1 and ADD1 polymorphisms in patients and controls.**

| Gene               | SNP                     | Genotype | Patients |          | Controls |          |
|--------------------|-------------------------|----------|----------|----------|----------|----------|
|                    |                         |          | Observed | Expected | Observed | Expected |
| <i>AGT</i>         | -532C/T<br>(rs5046)     | -532CC   | 38%      | 42%      | 51%      | 53%      |
|                    |                         | -532CT   | 53%      | 46%      | 45%      | 40%      |
|                    |                         | -532TT   | 09%      | 12%      | 04%      | 07%      |
|                    |                         | $\chi^2$ | 2.196    |          | 1.986    |          |
|                    |                         | <i>P</i> | 0.334    |          | 0.37     |          |
|                    |                         |          |          |          |          |          |
|                    | -217G/A<br>(rs5049)     | -217GG   | 47%      | 48%      | 63%      | 61%      |
|                    |                         | -217GA   | 44%      | 43%      | 30%      | 34%      |
|                    |                         | -217AA   | 09%      | 09%      | 07%      | 05%      |
|                    |                         | $\chi^2$ | 0.044    |          | 1.336    |          |
|                    |                         | <i>P</i> | 0.978    |          | 0.513    |          |
|                    |                         |          |          |          |          |          |
|                    | -152G/A<br>(rs11568020) | -152GG   | 92%      | 90%      | 94%      | 94%      |
|                    |                         | -152GA   | 06%      | 10%      | 06%      | 06%      |
|                    |                         | -152AA   | 02%      | 00%      | 00%      | 00%      |
|                    |                         | $\chi^2$ | 2.700    |          | 0.000    |          |
|                    |                         | <i>P</i> | 0.259    |          | 1.000    |          |
|                    |                         |          |          |          |          |          |
|                    | -20A/C<br>(rs5050)      | -20AA    | 28%      | 32%      | 50%      | 52%      |
| -20AC              |                         | 58%      | 49%      | 45%      | 40%      |          |
| -20CC              |                         | 14%      | 19%      | 05%      | 08%      |          |
| $\chi^2$           |                         | 0.469    |          | 1.827    |          |          |
| <i>P</i>           |                         | 0.177    |          | 0.401    |          |          |
|                    |                         |          |          |          |          |          |
| -6G/A<br>(rs5051)  | -6GG                    | 14%      | 16%      | 32%      | 29%      |          |
|                    | -6GA                    | 51%      | 48%      | 44%      | 50%      |          |
|                    | -6AA                    | 35%      | 36%      | 24%      | 21%      |          |
|                    | $\chi^2$                | 0.465    |          | 1.459    |          |          |
|                    | <i>P</i>                | 0.792    |          | 0.482    |          |          |
|                    |                         |          |          |          |          |          |
| 174T/M<br>(rs4762) | 174TT                   | 84%      | 83%      | 82%      | 81%      |          |
|                    | 174TM                   | 15%      | 16%      | 16%      | 18%      |          |
|                    | 174MM                   | 01%      | 01%      | 02%      | 01%      |          |
|                    | $\chi^2$                | 0.074    |          | 1.234    |          |          |
|                    | <i>P</i>                | 0.963    |          | 0.539    |          |          |
|                    |                         |          |          |          |          |          |
| 235M/T<br>(rs699)  | 235MM                   | 16%      | 15%      | 29%      | 32%      |          |
|                    | 235MT                   | 44%      | 47%      | 55%      | 49%      |          |
|                    | 235TT                   | 40%      | 38%      | 16%      | 19%      |          |
|                    | $\chi^2$                | 0.363    |          | 1.489    |          |          |
|                    | <i>P</i>                | 0.834    |          | 0.475    |          |          |
|                    |                         |          |          |          |          |          |

|              |                     |          |       |     |       |     |
|--------------|---------------------|----------|-------|-----|-------|-----|
| <b>ACE</b>   | I/D<br>(rs4646994)  | II       | 34%   | 33% | 38%   | 37% |
|              |                     | ID       | 46%   | 49% | 47%   | 48% |
|              |                     | DD       | 20%   | 18% | 15%   | 15% |
|              |                     | $\chi^2$ | 0.436 |     | 0.048 |     |
|              |                     | <i>P</i> | 0.804 |     | 0.976 |     |
| <b>AGTRI</b> | 1166A/C<br>(rs5186) | 1166AA   | 82%   | 82% | 83%   | 82% |
|              |                     | 1166AC   | 16%   | 17% | 15%   | 17% |
|              |                     | 1166CC   | 02%   | 01% | 02%   | 01% |
|              |                     | $\chi^2$ | 1.056 |     | 1.247 |     |
|              |                     | <i>P</i> | 0.589 |     | 0.536 |     |
| <b>ADD1</b>  | 614G/T<br>(rs4961)  | GG       | 57%   | 58% | 61%   | 61% |
|              |                     | GT       | 38%   | 36% | 34%   | 34% |
|              |                     | TT       | 05%   | 06% | 05%   | 05% |
|              |                     | $\chi^2$ | 0.295 |     | 0.000 |     |
|              |                     | <i>P</i> | 0.863 |     | 1.000 |     |

---

Comparison between observed and expected frequencies was performed; *P*-values and  $\chi^2$  tests were calculated by EPIINFO version 6.

**Supplementary table S5: Genotype and allele distribution of the AGT ACE, AGTR1 and ADD1 polymorphisms in controls and patients**

| Genes/<br>SNPs     | Genotype/<br>Alleles | Controls<br>n, (% distribution) | Patients   | Logistic regression analysis |         |               |
|--------------------|----------------------|---------------------------------|------------|------------------------------|---------|---------------|
|                    |                      |                                 |            | $\chi^2$                     | P-value | OR (95%CI)    |
| <b>AGT</b> -532C/T | -532CC               | 202 (51%)                       | 209 (38%)  | –                            | –       | Reference     |
|                    | -532CT               | 180 (45%)                       | 288 (53%)  | 0.71                         | 0.400   | 1.2(0.8–1.7)  |
|                    | -532TT               | 18 (05%)                        | 48 (09%)   | 2.04                         | 0.153   | 1.9(0.8–4.7)  |
|                    | -532C                | 584 (73%)                       | 706 (65%)  | –                            | –       | Reference     |
|                    | -532T                | 216 (27%)                       | 384 (35%)  | 9.54                         | 0.002   | 1.4(1.1–1.8)  |
| -217G/A            | -217GG               | 251 (63%)                       | 259 (48%)  | –                            | –       | Reference     |
|                    | -217GA               | 121 (30%)                       | 238 (44%)  | 0.81                         | 0.368   | 1.2(0.8–1.8)  |
|                    | -217AA               | 28 (07%)                        | 48 (09%)   | 1.41                         | 0.235   | 0.6(0.3–1.3)  |
|                    | -217G                | 623 (78%)                       | 756 (69%)  | –                            | –       | Reference     |
|                    | -217A                | 177 (22%)                       | 334 (31%)  | 8.09                         | 0.004   | 1.4(1.1–1.8)  |
| -152G/A            | -152GG               | 374 (94%)                       | 500 (92%)  | –                            | –       | Reference     |
|                    | -152GA               | 26 (7.0%)                       | 35 (6.0%)  | 0.10                         | 0.752   | 0.9(0.5–1.8)  |
|                    | -152AA               | 0 (0%)                          | 10 (02%)   | –                            | –       | –             |
|                    | -152G                | 774 (97%)                       | 1035 (95%) | –                            | –       | Reference     |
|                    | -152A                | 26 (03%)                        | 55 (05%)   | 0.18                         | 0.667   | 1.1(0.6–2.0)  |
| -20A/C             | -20AA                | 200 (50%)                       | 152 (28%)  | –                            | –       | Reference     |
|                    | -20AC                | 180 (45%)                       | 315 (58%)  | 38.99                        | 4.2E-10 | 3.4(2.3–4.9)  |
|                    | -20CC                | 20 (5%)                         | 78 (14%)   | 21.05                        | 4.5E-06 | 5.8(2.7–12.3) |
|                    | -20A                 | 580 (72%)                       | 619 (57%)  | –                            | –       | Reference     |
|                    | -20C                 | 220 (28%)                       | 471 (43%)  | 40.4                         | 2.1E-10 | 2.1(1.7–2.7)  |
| -6G/A              | -6GG                 | 127 (32%)                       | 79 (14%)   | –                            | –       | Reference     |
|                    | -6GA                 | 175 (44%)                       | 276 (51%)  | 22.40                        | 2.2E-06 | 3.1(1.9–4.9)  |
|                    | -6AA                 | 98 (25%)                        | 190 (35%)  | 10.18                        | 0.001   | 2.3(1.4–3.7)  |
|                    | -6G                  | 429 (54%)                       | 434 (40%)  | –                            | –       | Reference     |
|                    | -6A                  | 371 (46%)                       | 656 (60%)  | 23.1                         | 1.5E-06 | 1.7(1.4–2.1)  |
| 174T/M             | 174TT                | 328 (82%)                       | 456 (84%)  | –                            | –       | Reference     |
|                    | 174TM                | 65 (16%)                        | 83 (15%)   | 3.29                         | 0.070   | 0.6(0.4–1.0)  |
|                    | 173MM                | 07 (02%)                        | 06 (01%)   | 2.32                         | 0.128   | 0.3(0.1–1.4)  |
|                    | 174T                 | 721 (90%)                       | 995 (91%)  | –                            | –       | Reference     |
|                    | 174M                 | 79 (10%)                        | 95 (09%)   | 0.74                         | 0.389   | 0.9(0.8–1.1)  |
| 235M/T             | 235MM                | 116 (29%)                       | 87 (16%)   | –                            | –       | Reference     |
|                    | 235MT                | 221 (55%)                       | 241 (44%)  | 0.33                         | 0.564   | 1.1(0.7–1.8)  |
|                    | 235TT                | 63 (16%)                        | 217 (40%)  | 37.0                         | 1.2E-09 | 4.9(2.9–8.1)  |
|                    | 235M                 | 453 (57%)                       | 415 (38%)  | –                            | –       | Reference     |
|                    | 235T                 | 347 (43%)                       | 675 (62%)  | 58.0                         | 2.6E-14 | 2.4(1.9–2.9)  |
| <b>ACE</b><br>I/D  | II                   | 150 (38%)                       | 186 (34%)  | –                            | –       | Reference     |

|                     |        |           |           |       |       |              |
|---------------------|--------|-----------|-----------|-------|-------|--------------|
|                     | ID     | 188 (47%) | 252 (46%) | 1.08  | 0.299 | 0.8(0.6–1.2) |
|                     | DD     | 62 (16%)  | 107 (20%) | 2.65  | 0.104 | 1.5(0.9–2.5) |
|                     | I      | 488 (61%) | 624 (57%) | –     | –     | Reference    |
|                     | D      | 312 (39%) | 466 (43%) | 2.38  | 0.123 | 1.2(0.9–1.5) |
| <b><i>AGTRI</i></b> |        |           |           |       |       |              |
| 1166A/C             | 1166AA | 332 (83%) | 450 (83%) | –     | –     | Reference    |
|                     | 1166AC | 60 (15%)  | 86 (16%)  | 2.99  | 0.084 | 1.5(0.9–2.4) |
|                     | 1166CC | 08 (02%)  | 09 (02%)  | 2.60  | 0.107 | 0.4(0.1–1.2) |
|                     | 1166A  | 724 (90%) | 986 (90%) | –     | –     | Reference    |
|                     | 1166C  | 76 (10%)  | 104 (10%) | 1.56  | 0.211 | 0.8(0.5–1.1) |
| <b><i>ADDI</i></b>  |        |           |           |       |       |              |
| 614G/T              | 460GG  | 245 (61%) | 311 (57%) | –     | –     | Reference    |
|                     | 460GT  | 137 (34%) | 209 (38%) | 2.13  | 0.145 | 1.3(0.9–1.9) |
|                     | 460TT  | 18 (05%)  | 25 (05%)  | 0.08  | 0.782 | 1.1(0.5–2.8) |
|                     | 460G   | 627 (78%) | 831 (76%) | –     | –     | Reference    |
|                     | 460T   | 173 (22%) | 259 (24%) | 0.963 | 0.326 | 0.9(0.6–1.2) |

n, number subjects. *P*-value,  $\chi^2$  and odds ratio (OR) were calculated using multivariate logistic regression analysis after adjustment for age, gender, BMI, smoking, alcohol, triglyceride and cholesterol.

## References:

1. Yanai K, Saito T, Hirota K, et al. Molecular variation of the human angiotensinogen core promoter element located between the TATA box and transcription initiation site affects its transcriptional activity. *J Biol Chem* 1997;272:30558–62 doi: 10.1074/jbc.272.48.30558.
2. Wu SJ, Chiang FT, Jiang JR, et al. The G-217A variant of the angiotensinogen gene affects basal transcription and is associated with hypertension in a Taiwanese population. *J Hypertens* 2003;21:2061–7 doi: 10.1097/00004872-200311000-00015.
3. Mohana VU, Swapna N, Surender RS, et al. Gender-related association of AGT gene variants (M235T and T174M) with essential hypertension--a case-control study. *Clin Exp Hypertens* 2012;34:38–44 doi: 10.3109/10641963.2011.618207.
4. Charita B, Padma G, Sushma P, et al. Estimation of risk and interaction of single nucleotide polymorphisms at angiotensinogen locus causing susceptibility to essential hypertension: a case control study. *J Renin Angiotensin Aldosterone Syst* 2012;13:461-71 doi: 10.1177/1470320312444650.
5. Campbell CY, Fang BF, Guo X, et al. Associations between genetic variants in the ACE, AGT, AGTR1 and AGTR2 genes and renal function in the Multi-ethnic Study of Atherosclerosis. *Am J Nephrol* 2010;32(2):156–62 doi: 10.1159/000315866.
6. Jeunemaitre X, Soubrier F, Kotelevtsev YV, et al. Molecular basis of human hypertension: role of angiotensinogen. *Cell* 1992;71:169–80 doi: 10.1016/0092-8674(92)90275-H.
7. Rigat B, Hubert C, Alhenc-Gelas F, et al. An insertion/deletion polymorphism in the angiotensin I-converting enzyme gene accounting for half the variance of serum enzyme levels. *J Clin Invest* 1990;86:1343–6 doi: 10.1172/JCI114844.
8. Danser AH, Schalekamp MA, Bax WA, et al. Angiotensin-converting enzyme in the human heart. Effect of the deletion/insertion polymorphism. *Circulation* 1995;92:1387–8.
9. Bhavani BA, Padma T, Sastry BKS, et al. Gender specific association of Insertional/Deletion Polymorphisms of the Human Angiotension Converting Enzyme Gene with Essential hypertension. *Int J Hum Genet* 2004;4:207–13.
10. Jin Y, Kuznetsova T, Thijs L, et al. Association of left ventricular mass with the AGTR1 A1166C polymorphism. *Am J Hypertens* 2012;25:472–8 doi: 10.1161/01.CIR.92.6.1387.
11. Staessen JA, Bianchi G. Adducin and hypertension. *Pharmacogenomics* 2005;6(7):665–9 doi: 10.2217/14622416.6.7.665.
